# Supplementary material
Source: PubMed Central journal article supplement (PMC520945)
Supplement: plntcell_tpc.104.022608_5.pdf [file plntcell_tpc.104.022608_5.pdf]

**Table 2** Gene specific oligonucleotide primers used in this study for qRT-PCR

| <b>Gene descriptor</b> | <b>Locus Number</b> | <b>Forward primer</b>          | <b>Reverse primer</b>           |
|------------------------|---------------------|--------------------------------|---------------------------------|
| putative ferritin      | At2g40300           | 5'ATTTCATGGCGTGAAGAAG3'        | 5'TTTGTTCGAGCGAGTGAGAGA3'       |
| unknown protein Ls257  | At4g21830           | 5'TGGAGCATCTCTGTTTCGTG3'       | 5'CGGGAGAGTCCACGTAATGT3'        |
| B-1,3-glucosidase      | At3g57260           | 5'TATGCAGCATTGGAGAAATCAG3'     | 5'GACTGTTCGATCTGGATGAAACA3'     |
| RAB18 dehydrin         | At5g66400           | 5'AAGATCAAGGAGAAGTTGCCAG3'     | 5'AGTAAACAACACACATCGCAGG3'      |
| class IV chitinase     | At2g43570           | 5'TTGGACGAGAACTTATTGGCTT3'     | 5'CACTAGTTGTGTTTCGGATGGA3'      |
| <i>CAT2</i>            | At1g70630           | 5'CCAGCTTCTGTCCCAAAGAC3'       | 5'GGAAAACGTGAGAGGTGCAT3'        |
| HSP70-1 like           | At4g24280           | 5'GCATCGATCACATCATCACC3'       | 5'GGAAGTGGATCAACCCAAGA3'        |
| ERD10                  | At1g20450           | 5'GATGTCAGCAATCGGTGTTG3'       | 5'AACCAGGGGGTGATGATGTA3'        |
| <i>GST</i>             | At2g29450           | 5'CCCAACCTCTCTCCAAACAA3'       | 5'AACAGATTATGAACCGTGGGG3'       |
| SRC2-like protein      | At1g09070           | 5'CACCCATGTCACCCATATCA3'       | 5'GGTTACCCGCAACAAGGTTA3'        |
| water-stress gene      | At1g56600           | 5'AACCTTGGAGATTCACTGGAGA3'     | 5'TGCAGATGGAGCTTTGACATAC3'      |
| <i>FSD1</i>            | At4g25100           | 5'CATCAGGAGAGCTTCTTGCTTT3'     | 5'ACAGCTTCCCAAGACACAAGAT3'      |
| <i>CSD2</i>            | At2g28190           | 5'AACCCTAACAAACATGACACACG3'    | 5'CTTAGCCTCTGACTTAGAGCGG3'      |
| <i>APX2</i>            | At3g09640           | 5'TGATGTGAAGACGAAGACAGGAGGAC3' | 5'AGGGTCAAGAAGCCTAACGGCAATATC3' |
