# Supplementary material
Source: PubMed Central journal article supplement (PMC520945)

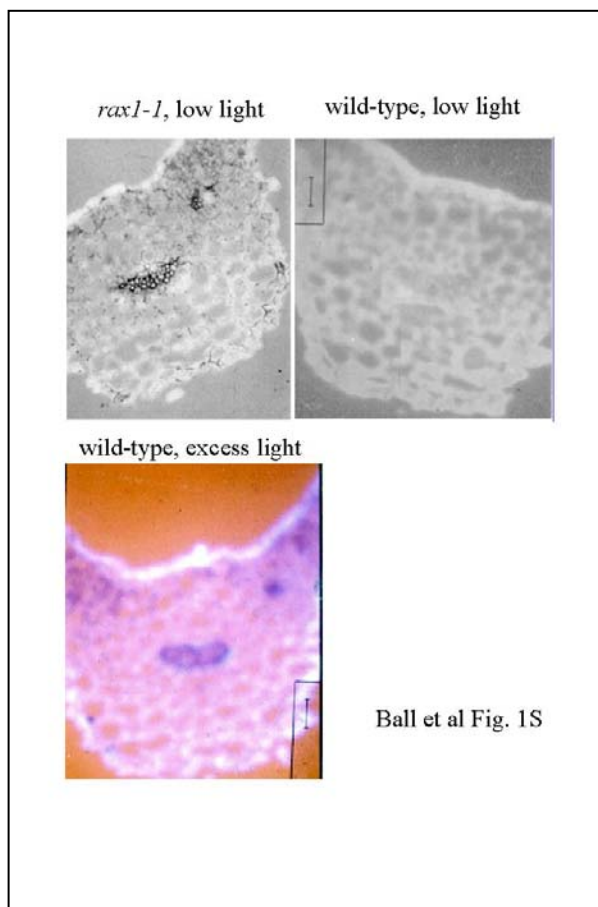

Supplement: plntcell_tpc.104.022608_1.pdf [file plntcell_tpc.104.022608_1.pdf]
